# Supplementary material for: Ultralight elastic Al2O3nanorod-graphene aerogel for pressure sensing and thermal superinsulation
Source: Royal Society of Chemistry journal article supplement (doi:10.1039/d3ra01070h), 2023-01-01
Supplement: d3ra01070h1.pdf [file d3ra01070h1.pdf]

## Supporting Information

### Ultralight elastic Al<sub>2</sub>O<sub>3</sub> nanorod-graphene aerogel for pressure sensing and thermal superinsulation

Fengqi Liu, Yonggang Jiang\*, Junzong Feng, Liangjun Li, Jian Feng\*

Science and Technology on Advanced Ceramic Fibers and Composites Laboratory,  
College of Aerospace Science and Technology, National University of Defense  
Technology, Changsha 410073, P.R. China

\* E-mail: jygemail@nudt.edu.cn (Y. G. Jiang), fengj@nudt.edu.cn (J. Feng)

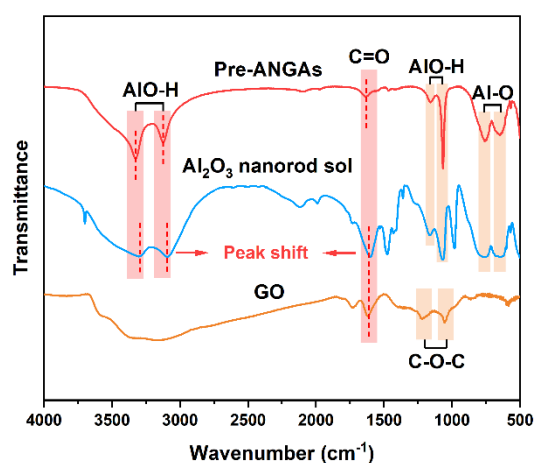

**Fig. S1.** FTIR spectra of GO, Al<sub>2</sub>O<sub>3</sub> nanorod sol and Pre-ANGAs.

**Fig. S1** shows the FTIR patterns of graphene oxide (GO), Al<sub>2</sub>O<sub>3</sub> nanorod sol, and precursors of ANGAs (Pre-ANGAs) after freeze-drying. Due to the presence of organic substances in the Al<sub>2</sub>O<sub>3</sub> nanorod sol (acetate and aluminum acetate), absorption peaks attributed to C=O (1610 cm<sup>-1</sup>) appear in both Al<sub>2</sub>O<sub>3</sub> nanorod sol and GO spectra<sup>9,10</sup>. The peaks at 1090 and 1220 cm<sup>-1</sup> are attributed to methylene ether bridges (C-O-C) and the broad peak at around 3400 cm<sup>-1</sup> belongs to -OH [26]. Several typical characteristic peaks in Al<sub>2</sub>O<sub>3</sub> nanorod sol originate from the stretching vibrations (3099 and 3285 cm<sup>-1</sup>) and bending vibrations (1070, 1162 cm<sup>-1</sup>) of AlO-H, and the torsional vibrations

of Al-O ( $650$  and  $760\text{ cm}^{-1}$ ), respectively <sup>11,12</sup>. Notably, after integrating ARs, RF, no new characteristic peaks appear in Pre-ANGAs, but the C=O peak is slightly shifted to  $1630\text{ cm}^{-1}$ , and the stretching vibration peaks of Al-O are also shifted ( $3120$  and  $3320\text{ cm}^{-1}$ ), implying the hydrogen bonding between GO and  $\text{Al}_2\text{O}_3$  nanorods.

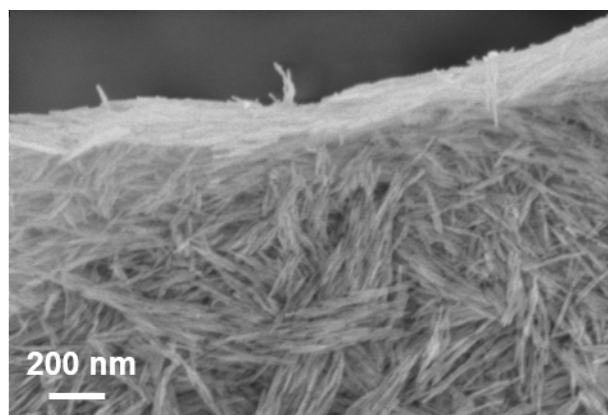

**Fig.S2.** Enlarged SEM image of ANGAs.

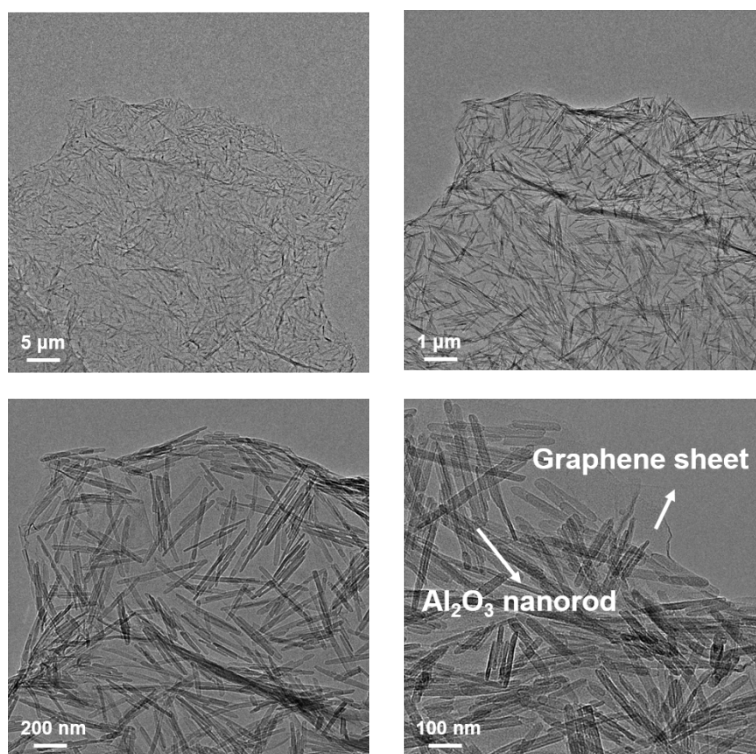

**Fig. S3.** TEM images of ANGAs.

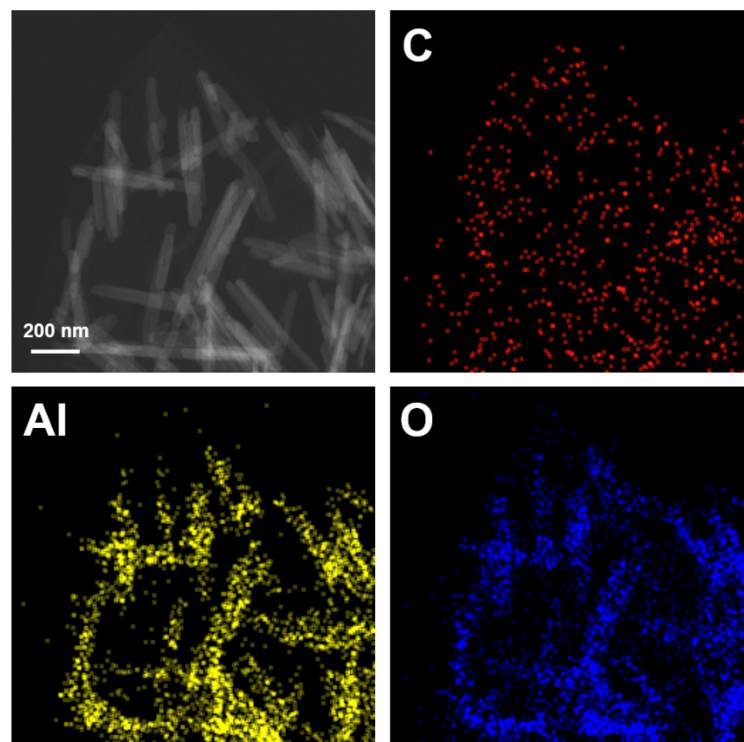

**Fig. S4.** EDS mappings of ANGAs.

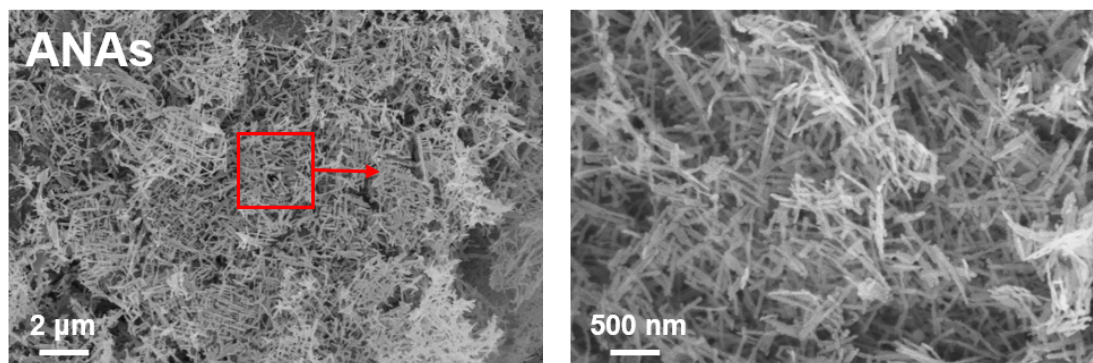

**Fig. S5.** SEM images of ANAs
